# Supplementary material for: Tides of Change—Barriers and Facilitators to Beach Accessibility for Older People and People with Disability: An Australian Community Survey
Source: MDPI journal article supplement (doi:10.3390/ijerph20095651), 2023-04-26
Supplement: s1 [file s1]

**Supplementary Material S3.** Mann-Whitney U results for facilitators to beach access for disability and mobility status subgroups

| Facilitator                                     | Mann-Whitney U<br>Mobility vs. non-<br>mobility<br>disability                            | Facilitator                                                 | Mann-Whitney U<br>Mobility vs. non-<br>mobility<br>disability                            |
|-------------------------------------------------|------------------------------------------------------------------------------------------|-------------------------------------------------------------|------------------------------------------------------------------------------------------|
| More accessible parking                         | 2271.500; $p = 0.078$<br>MR Mobility<br>73.49<br>MR Non-mobility<br>85.14<br>$r = -0.14$ | Food retail services within 150m                            | 2463.500; $p = 0.400$<br>MR Mobility<br>79.61<br>MR Non-mobility<br>73.48<br>$r = -0.07$ |
| Accessible parking closer to beach access point | 2556.500; $p = 0.601$<br>MR Mobility<br>76.31<br>MR Non-mobility<br>79.76<br>$r = -0.04$ | Accessible shaded recreational areas                        | 2516.000; $p = 0.517$<br>MR Mobility<br>75.91<br>MR Non-mobility<br>80.53<br>$r = -0.05$ |
| Accessible leadup pathways to beach             | 2626.000; $p = 0.802$<br>MR Mobility<br>77.00<br>MR Non-mobility<br>78.45<br>$r = -0.02$ | Accessible playground                                       | 2439.500; $p = 0.349$<br>MR Mobility<br>75.15<br>MR Non-mobility<br>81.97<br>$r = -0.08$ |
| Sand walkway/ access mat                        | 2459.500; $p = 0.237$<br>MR Mobility<br>79.65<br>MR Non-mobility<br>73.41<br>$r = -0.10$ | Physical assistance – car transfers                         | 2654.500; $p = 0.931$<br>MR Mobility<br>77.72<br>MR Non-mobility<br>77.08<br>$r = -0.01$ |
| Push beach wheeled walker                       | 2454.500; $p = 0.359$<br>MR Mobility<br>79.70<br>MR Non-mobility<br>73.31<br>$r = -0.07$ | Physical assistance – transfers to beach mobility equipment | 2624.000; $p = 0.837$<br>MR Mobility<br>78.02<br>MR Non-mobility<br>76.51<br>$r = -0.02$ |
| Wheelchair – sand access                        | 2313.000; $p = 0.125$<br>MR Mobility<br>73.90<br>MR Non-mobility<br>84.36<br>$r = -0.12$ | Physical assistance – personal care activities              | 2384.500; $p = 0.248$<br>MR Mobility<br>74.61<br>MR Non-mobility<br>83.01<br>$r = -0.09$ |
| Wheelchair – water access                       | 2170.000; $p = 0.033$<br>MR Mobility<br>72.49<br>MR Non-mobility<br>87.06<br>$r = -0.17$ | Physical assistance – beach activities                      | 2324.000; $p = 0.163$<br>MR Mobility<br>74.01<br>MR Non-mobility<br>84.15<br>$r = -0.11$ |
| Accessible toilet                               | 2181.500; $p = 0.033$<br>MR Mobility<br>72.60<br>MR Non-mobility<br>86.84<br>$r = -0.17$ | Physical assistance – ocean activities                      | 2368.000; $p = 0.218$<br>MR Mobility<br>74.45<br>MR Non-mobility<br>83.32<br>$r = -0.10$ |

|                            |                                                                                          |                                                                                  |                                                                                          |
|----------------------------|------------------------------------------------------------------------------------------|----------------------------------------------------------------------------------|------------------------------------------------------------------------------------------|
| Accessible shower          | 2261.500; $p = 0.086$<br>MR Mobility<br>73.39<br>MR Non-mobility<br>85.33<br>$r = -0.14$ | Accessible beach<br>events and<br>activities                                     | 2514.000; $p = 0.508$<br>MR Mobility<br>75.89<br>MR Non-mobility<br>80.57<br>$r = -0.01$ |
| Accessible change<br>room  | 2195.000; $p = 0.047$<br>MR Mobility<br>72.73<br>MR Non-mobility<br>86.58<br>$r = -0.16$ | Booking system<br>for accessibility<br>equipment                                 | 2337.500; $p = 0.164$<br>MR Mobility<br>74.14<br>MR Non-mobility<br>83.90<br>$r = -0.11$ |
| Accessible change<br>table | 2330.000; $p = 0.170$<br>MR Mobility<br>74.07<br>MR Non-mobility<br>84.04<br>$r = -0.11$ | Calendar of<br>equipment<br>availability and<br>accessible events/<br>activities | 2573.500; $p = 0.654$<br>MR Mobility<br>76.48<br>MR Non-mobility<br>79.44<br>$r = -0.04$ |
| Hoist availability         | 2175.500; $p = 0.047$<br>MR Mobility<br>72.54<br>MR Non-mobility<br>86.95<br>$r = -0.16$ |                                                                                  |                                                                                          |

Note: MR = mean rank. Cell shading is used to highlight the effect size in the Mann-Whitney-U test where significant between group differences were found (white = no significant difference; light blue = significant difference with small effect size ( $r < 0.3$ ); mid blue = significant difference with moderate effect size ( $r = 0.3 - < 0.5$ ); dark blue = significant difference with large effect size ( $r \geq 0.5$ )).
