# Supplementary material for: Tides of Change—Barriers and Facilitators to Beach Accessibility for Older People and People with Disability: An Australian Community Survey
Source: MDPI journal article supplement (doi:10.3390/ijerph20095651), 2023-04-26
Supplement: s1 [file s1]

**Supplementary Material S2.** Mann-Whitney U results for barriers to beach access for disability and mobility status subgroups

| Barrier                                           | Mann-Whitney U<br>Mobility vs. non-mobility disability                                   | Barrier                                                    | Mann-Whitney U<br>Mobility vs. non-mobility disability                                   |
|---------------------------------------------------|------------------------------------------------------------------------------------------|------------------------------------------------------------|------------------------------------------------------------------------------------------|
| Limited accessible parking                        | 2325.500; $p = 0.158$<br>MR Mobility<br>74.02<br>MR Non-mobility<br>84.12<br>$r = -0.11$ | Limited specialised beach mobility equipment               | 2580.000; $p = 0.683$<br>MR Mobility<br>78.46<br>MR Non-mobility<br>75.68<br>$r = -0.03$ |
| Parking proximity to beach access point           | 2625.000; $p = 0.836$<br>MR Mobility<br>76.99<br>MR Non-mobility<br>78.47<br>$r = -0.02$ | No hoist availability                                      | 2092.500; $p = 0.022$<br>MR Mobility<br>71.72<br>MR Non-mobility<br>88.52<br>$r = -0.18$ |
| Physically challenging geography leading to beach | 2501.000; $p = 0.473$<br>MR Mobility<br>79.24<br>MR Non-mobility<br>74.19<br>$r = -0.06$ | Limited retail services within 150m                        | 2384.000; $p = 0.246$<br>MR Mobility<br>74.60<br>MR Non-mobility<br>83.02<br>$r = -0.09$ |
| Inaccessible leadup pathways to beach             | 2628.500; $p = 0.843$<br>MR Mobility<br>77.98<br>MR Non-mobility<br>76.59<br>$r = -0.02$ | Inaccessible shaded recreational areas                     | 2282.500; $p = 0.122$<br>MR Mobility<br>73.60<br>MR Non-mobility<br>84.93<br>$r = -0.12$ |
| Inaccessible toilet                               | 1891.000; $p = 0.002$<br>MR Mobility<br>69.73<br>MR Non-mobility<br>92.31<br>$r = -0.25$ | Lack of physical assistance for transfers                  | 2459.500; $p = 0.398$<br>MR Mobility<br>75.35<br>MR Non-mobility<br>81.59<br>$r = -0.07$ |
| Inaccessible shower                               | 1866.500; $p = 0.001$<br>MR Mobility<br>69.48<br>MR Non-mobility<br>92.78<br>$r = -0.26$ | Lack of physical assistance available for beach activities | 2582.500; $p = 0.713$<br>MR Mobility<br>76.57<br>MR Non-mobility<br>79.27<br>$r = -0.03$ |
| Inaccessible change room                          | 1925.500; $p = 0.003$<br>MR Mobility<br>70.06<br>MR Non-mobility<br>91.67<br>$r = -0.24$ | Personal safety – fear of falling                          | 2676.000; $p = 0.998$<br>MR Mobility<br>77.50<br>MR Non-mobility<br>77.49<br>$r = -0.00$ |
| Difficulty moving – soft sand                     | 2492.000; $p = 0.316$<br>MR Mobility<br>79.33<br>MR Non-mobility<br>74.02<br>$r = -0.08$ | Personal safety – reduced confidence outdoor mobility      | 2617.000; $p = 0.815$<br>MR Mobility<br>76.91<br>MR Non-mobility<br>78.62<br>$r = -0.02$ |
| Difficulty moving – hard sand                     | 2473.500; $p = 0.422$<br>MR Mobility<br>75.49                                            | Personal safety – fear of water                            | 2564.000; $p = 0.658$<br>MR Mobility<br>76.39                                            |

|                              |                                                                               |                                       |
|------------------------------|-------------------------------------------------------------------------------|---------------------------------------|
|                              | MR Non-mobility<br>81.33<br>r = -0.06                                         | MR Non-mobility<br>79.62<br>r = -0.04 |
| Difficult to access<br>water | 2660.500; p=0.944<br>MR Mobility 77.66<br>MR Non-mobility<br>77.20<br>r=-0.01 |                                       |

Note: MR = mean rank. Cell shading is used to highlight the effect size in the Mann-Whitney-U test where significant between group differences were found (white = no significant difference; light blue = significant difference with small effect size ( $r < 0.3$ ); mid blue = significant difference with moderate effect size ( $r = 0.3 - < 0.5$ ); dark blue = significant difference with large effect size ( $r \geq 0.5$ )).
